# Supplementary material for: The Ni(II)-Binding Activity of the Intrinsically Disordered Region of Human NDRG1, a Protein Involved in Cancer Development
Source: MDPI journal article supplement (doi:10.3390/biom12091272), 2022-09-09
Supplement: s1 [file s1]

# **The Ni(II) binding activity of the intrinsically disordered region of human NDRG1, a protein involved in cancer development**

Ylenia Beniamino<sup>a</sup>, Vittoria Cenni<sup>b</sup>, Mario Piccioli<sup>c</sup>, Stefano Ciurli<sup>a\*</sup>, Barbara Zambelli<sup>a\*</sup>

<sup>a</sup> *Department of Pharmacy and Biotechnology, Laboratory of Bioinorganic Chemistry, University of Bologna: Viale Giuseppe Fanin 40, 40127 Bologna, Italy,*

<sup>b</sup> *CNR Institute of Molecular Genetics “Luigi-Luca Cavalli-Sforza” Unit of Bologna, Via di Barbiano 1/10, 40136 Bologna, Italy*

<sup>c</sup> *Department of Chemistry, Center for Magnetic Resonance, University of Florence, 50121 Florence, Italy;*

\* Corresponding authors: [stefano.ciurli@unibo.it](mailto:stefano.ciurli@unibo.it); [barbara.zambelli@unibo.it](mailto:barbara.zambelli@unibo.it)

## **SUPPLEMENTARY MATERIALS**

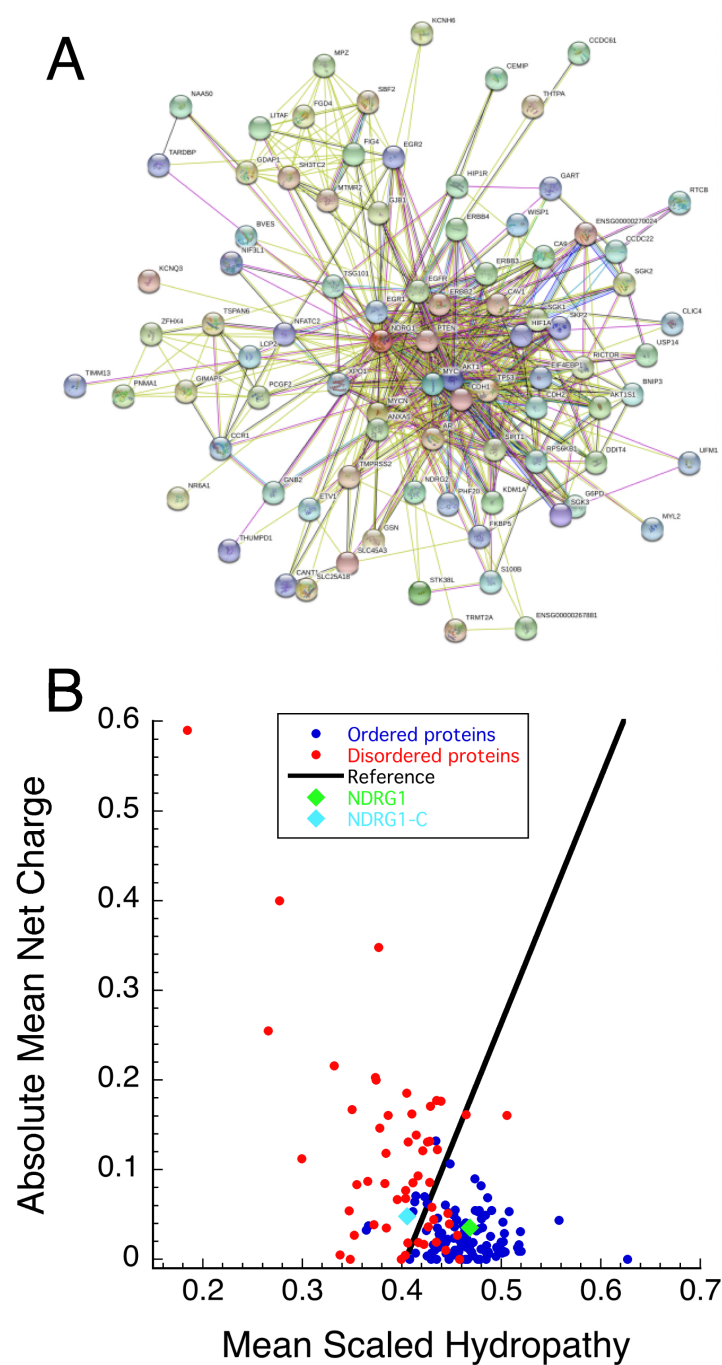

**Figure S1.** A) Visualization of the interactivity of *hNDRG1* by the STRING computational platform. B) Relation between mean net charge and hydropathy for *hNDRG1* and *hNDRG1*\*C represented in the CH-plot, predicting the ordered or disordered nature of both proteins.

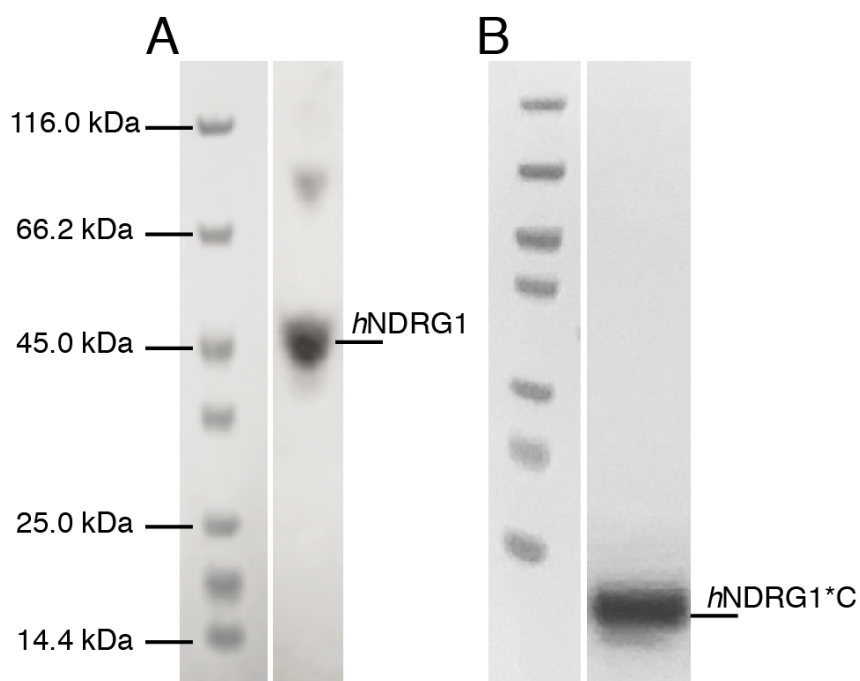

**Figure S2.** SDS-Page of the purified *hNDRG1* (A) and *hNDRG1*\*C (B) after the last size-exclusion chromatographic step. The molecular weight marker with the corresponding MW is represented on the left side of each line.

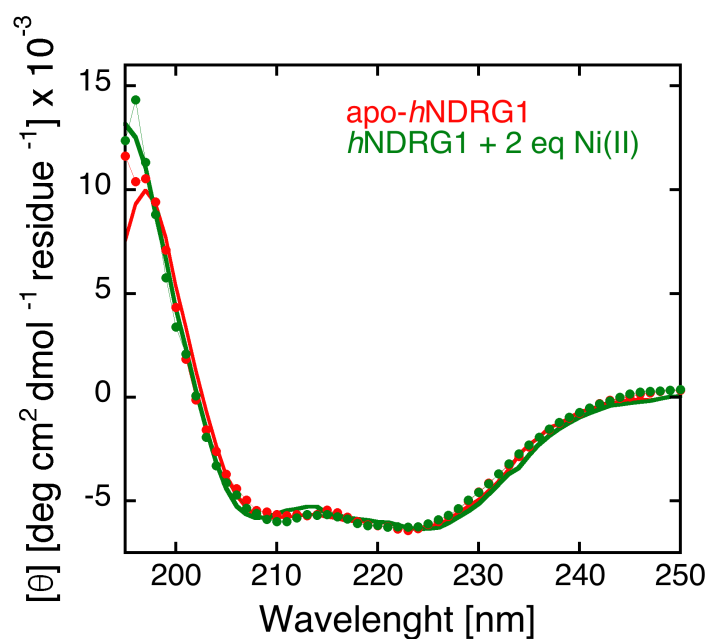

**Figure S3.** Far-UV CD spectra of *hNDRG1* in the absence (red) and in the presence (green) of Ni(II). The fit of the data performed using BestSel is indicated as a line.



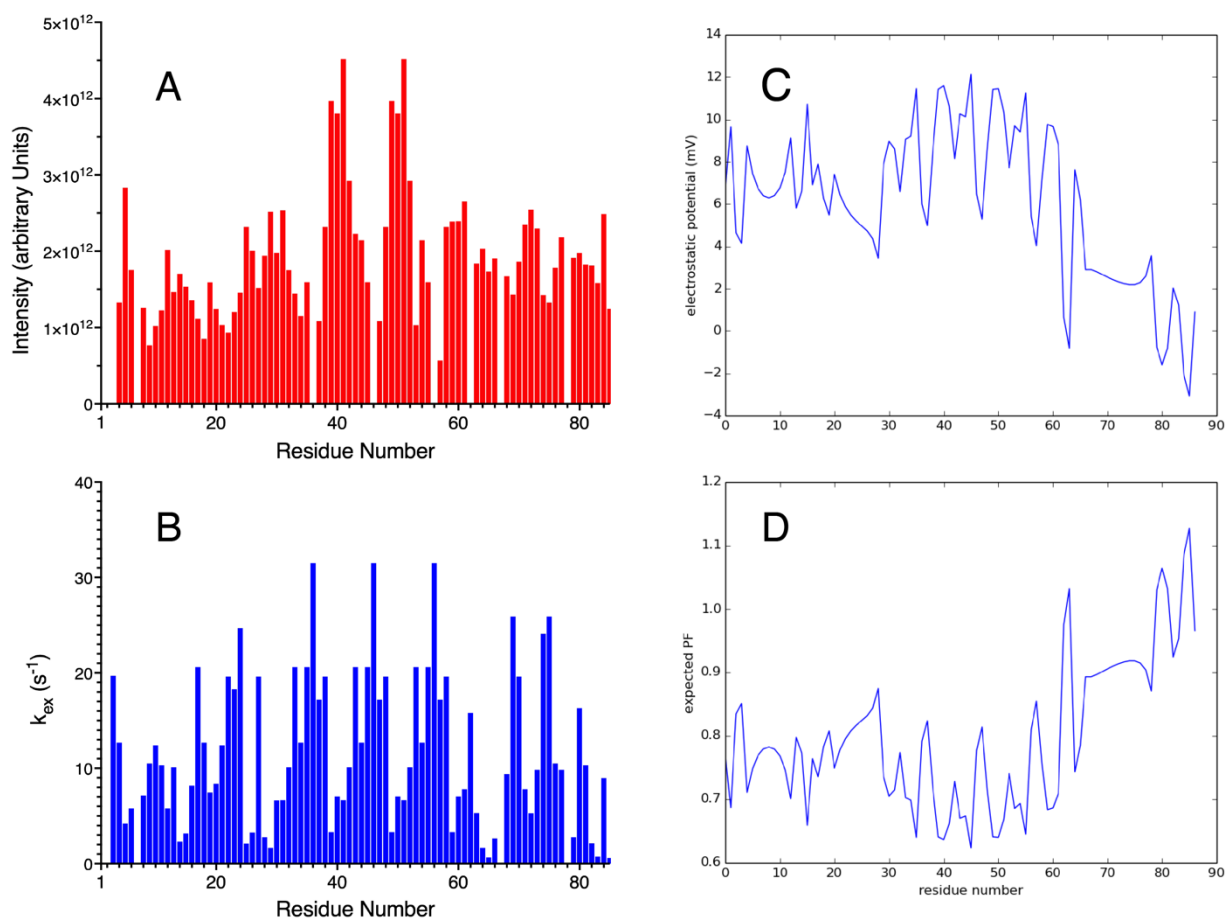

**Figure S5.** (A)  $hNDRG1^*C$  amide NH signal intensities at pH 6.5 as resulting from the  $^1H,^{15}N$  HSQC spectrum; (B) intrinsic exchange rate for that residue predicted using SPHERE (<https://protocol.fccc.edu/research/labs/roder/sphere/sphere.html>); (C) electrostatic potential and (D) protection factor calculated using the recently proposed approach by Mulder et al. <sup>1</sup>

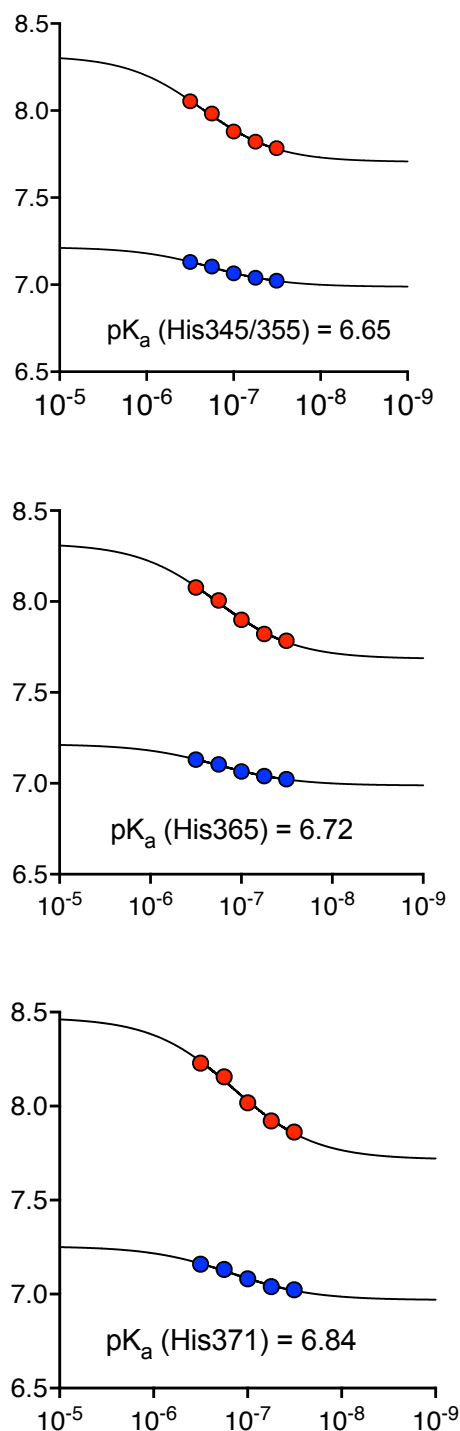

**Figure S6.** pH dependence of the chemical shifts of HE1 (red dots) and HD2 (blue dots) protons for the four histidine residues in *hNDRG1*\*C, and the calculated values of the individual  $pK_a$  obtained from simultaneous non-linear fits of to the following one-ionization equation (Eq. 1)

$$\delta_{obs} = \frac{[H^+] \cdot \delta_{HisH} + K \cdot \delta_{His}}{[H^+] + K} \quad (1)$$

where  $\delta_{obs}$  is the observed experimental chemical shift,  $\delta_{HisH}$  and  $\delta_{His}$  are the chemical shifts of the protonated and neutral forms of the histidine imidazole, and  $K$  is the dissociation constant for the ionization equilibrium.

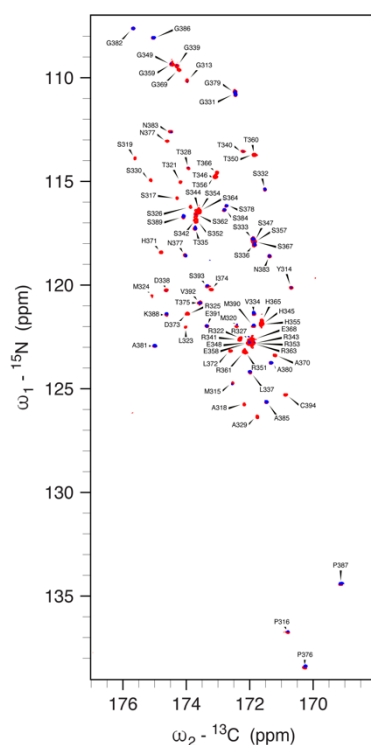

**Figure S7.** 700 MHz (16.4 T) 2D CON spectrum obtained by  $^{13}\text{C}$  direct detection, acquired at 298 K on samples of  $^{13}\text{C}$ ,  $^{15}\text{N}$  labeled *hNDRG1-C*, at pH 7.5 in the absence (red) and presence (blue) of 3 eq. Ni(II). The resonances are labeled according to the  $^{15}\text{N}$  frequency.

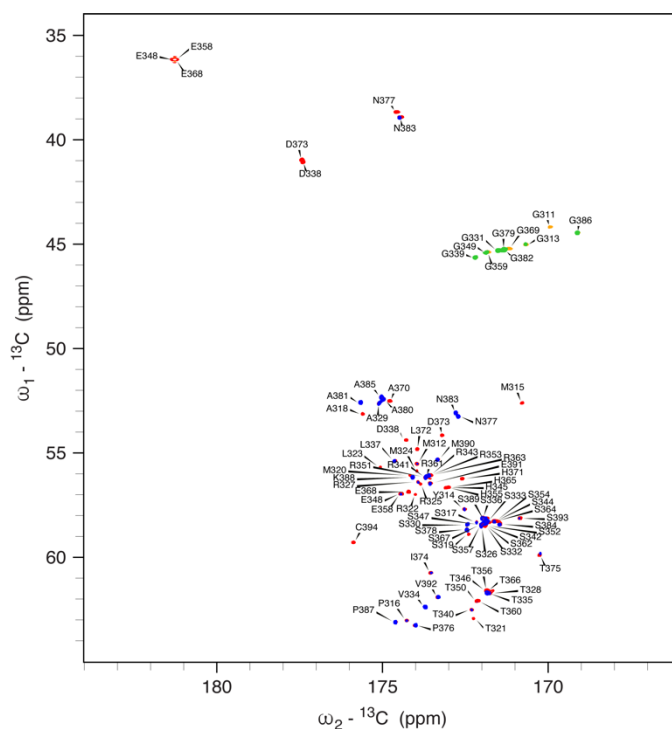

**Figure S8.** 700 MHz (16.4 T) 2D CACO spectrum obtained by  $^{13}\text{C}$  direct detection, acquired at 298 K on samples of  $^{13}\text{C}$ ,  $^{15}\text{N}$  labeled *hNDRG1-C*, at pH 7.5 in the absence (red positive, orange negative) and presence (blue positive, green negative) of 3 eq. Ni(II). The resonances are labeled according to the  $^{13}\text{C}$  frequencies of the CO and CA nuclei of each amino acid, except for the signals for the side chains of Asp and Glu residues, for which the CB-CG and CG-CD are explicitly indicated.

**Table S1.** NMR experiments carried out on  $^{13}\text{C}$ ,  $^{15}\text{N}$  labelled NDRG1-C in 95%  $\text{H}_2\text{O}$  / 5%  $\text{D}_2\text{O}$  at 298 K and pH 6.5 for backbone resonance assignment. SW: spectral width in each dimension; TD: number of complex points in each dimension; NUS: amount of sparse sampling (if not indicated conventional sampling was used); CT = constant time

| NMR experiment                                  |              |                 |                 |
|-------------------------------------------------|--------------|-----------------|-----------------|
| $^1\text{H}$ - $^{15}\text{N}$ HSQC             | $^1\text{H}$ | $^{15}\text{N}$ |                 |
| SW (Hz)                                         | 10416.667    | 2923.977        |                 |
| maximal evolution time (ms)                     | 98.3         | 43.8            |                 |
| TD                                              | 2048         | 256             |                 |
| $^1\text{H}$ - $^1\text{H}$ TOCSY               | $^1\text{H}$ | $^1\text{H}$    |                 |
| SW (Hz)                                         | 11904.762    | 11904.762       |                 |
| maximal evolution time (ms)                     | 6.5          | 2.7             |                 |
| TD                                              | 1536         | 640             |                 |
| $^1\text{H}$ - $^{13}\text{C}$ HSQC             | $^1\text{H}$ | $^{13}\text{C}$ |                 |
| SW (Hz)                                         | 10416.667    | 50000.000       |                 |
| maximal evolution time (ms)                     | 98.3         | 5.12            |                 |
| TD                                              | 1024         | 512             |                 |
| $^1\text{H}$ - $^{13}\text{C}$ HSQC CT          | $^1\text{H}$ | $^{13}\text{C}$ |                 |
| SW (Hz)                                         | 19230.770    | 22727.273       |                 |
| maximal evolution time (ms)                     | 53.2         | 11.3            |                 |
| TD                                              | 2048         | 512             |                 |
| $^1\text{H}$ - $^{13}\text{C}$ HSQC aromatic    | $^1\text{H}$ | $^{13}\text{C}$ |                 |
| SW (Hz)                                         | 11904.762    | 9090.909        |                 |
| maximal evolution time (ms)                     | 6.5          | 14.1            |                 |
| TD                                              | 1536         | 256             |                 |
| $^1\text{H}$ - $^{13}\text{C}$ HSQC CT aromatic | $^1\text{H}$ | $^{13}\text{C}$ |                 |
| SW (Hz)                                         | 11904.762    | 9090.909        |                 |
| maximal evolution time (ms)                     | 6.5          | 14.1            |                 |
| TD                                              | 1536         | 256             |                 |
| hbCBcgcdHD (CBHD)                               | $^1\text{H}$ | $^{13}\text{C}$ |                 |
| SW (Hz)                                         | 11904.762    | 6250.000        |                 |
| maximal evolution time (ms)                     | 6.5          | 8.5             |                 |
| TD                                              | 1536         | 106             |                 |
| HNCO                                            | $^1\text{H}$ | $^{15}\text{N}$ | $^{13}\text{C}$ |
| SW (Hz)                                         | 10416.667    | 2923.977        | 2702.703        |
| maximal evolution time (ms)                     | 196.6        | 87.6            | 47.4            |
| TD                                              | 4096         | 512             | 256             |
| NUS (%)                                         | 4            |                 |                 |
| HN(CA)CO                                        | $^1\text{H}$ | $^{15}\text{N}$ | $^{13}\text{C}$ |
| SW (Hz)                                         | 10416.667    | 2923.977        | 2702.703        |
| maximal evolution time (ms)                     | 196.6        | 87.6            | 47.4            |
| TD                                              | 4096         | 512             | 256             |
| NUS (%)                                         | 4            |                 |                 |
| HNCA                                            | $^1\text{H}$ | $^{15}\text{N}$ | $^{13}\text{C}$ |
| SW (Hz)                                         | 10416.667    | 2923.977        | 8333.333        |
| maximal evolution time (ms)                     | 98.3         | 23.9            | 11.3            |
| TD                                              | 2048         | 128             | 192             |
| NUS (%)                                         | 9.8          |                 |                 |
| HNCACB                                          | $^1\text{H}$ | $^{15}\text{N}$ | $^{13}\text{C}$ |
| SW (Hz)                                         | 10416.667    | 2923.977        | 22727.273       |
| maximal evolution time (ms)                     | 98.3         | 23.9            | 11.3            |
| TD                                              | 2048         | 128             | 512             |
| NUS (%)                                         | 4.9          |                 |                 |
| HN(CO)CACB                                      | $^1\text{H}$ | $^{15}\text{N}$ | $^{13}\text{C}$ |
| SW (Hz)                                         | 10416.667    | 2923.977        | 8333.333        |
| maximal evolution time (ms)                     | 98.3         | 23.9            | 11.3            |
| TD                                              | 2048         | 128             | 512             |
| NUS (%)                                         | 5            |                 |                 |



| CBCA(CO)NH                  | <sup>1</sup> H  | <sup>15</sup> N | <sup>13</sup> C |
|-----------------------------|-----------------|-----------------|-----------------|
| SW (Hz)                     | 10416.667       | 2923.977        | 22727.273       |
| maximal evolution time (ms) | 98.3            | 23.9            | 6.6             |
| TD                          | 2048            | 128             | 300             |
| NUS (%)                     | 10              |                 |                 |
| HBHANH                      | <sup>1</sup> H  | <sup>15</sup> N | <sup>1</sup> H  |
| SW (Hz)                     | 10416.667       | 2923.977        | 6666.667        |
| maximal evolution time (ms) | 98.3            | 23.9            | 38.4            |
| TD                          | 2048            | 140             | 512             |
| NUS (%)                     | 4               |                 |                 |
| HBHA(CO)NH                  | <sup>1</sup> H  | <sup>15</sup> N | <sup>1</sup> H  |
| SW (Hz)                     | 10416.667       | 2923.977        | 6666.667        |
| maximal evolution time (ms) | 98.3            | 23.9            | 38.4            |
| TD                          | 2048            | 140             | 512             |
| NUS (%)                     | 4               |                 |                 |
| C(CO)NH                     | <sup>1</sup> H  | <sup>15</sup> N | <sup>13</sup> C |
| SW (Hz)                     | 10416.667       | 2923.977        | 22727.273       |
| maximal evolution time (ms) | 98.3            | 23.9            | 11.3            |
| TD                          | 2048            | 128             | 512             |
| NUS (%)                     | 2               |                 |                 |
| (H)CCH-TOCSY                | <sup>1</sup> H  | <sup>13</sup> C | <sup>13</sup> C |
| SW (Hz)                     | 10416.667       | 22727.273       | 22727.273       |
| maximal evolution time (ms) | 98.3            | 28.2            | 11.3            |
| TD                          | 2048            | 128             | 512             |
| NUS (%)                     | 4               |                 |                 |
| HC(C)H-TOCSY                | <sup>1</sup> H  | <sup>13</sup> C | <sup>1</sup> H  |
| SW (Hz)                     | 10416.667       | 22727.273       | 22727.273       |
| maximal evolution time (ms) | 98.3            | 28.2            | 5882.353        |
| TD                          | 1024            | 128             | 1024            |
| NUS (%)                     | 5               |                 |                 |
| hCON                        | <sup>13</sup> C | <sup>15</sup> N |                 |
| SW (Hz)                     | 5555.556        | 2840.909        |                 |
| maximal evolution time (ms) | 92.2            | 90.1            |                 |
| TD                          | 1024            | 512             |                 |
| hCACO                       | <sup>13</sup> C | <sup>13</sup> C |                 |
| SW (Hz)                     | 5555.556        | 6369.427        |                 |
| maximal evolution time (ms) | 92.2            | 27.5            |                 |
| TD                          | 1024            | 350             |                 |
| hCBCACO                     | <sup>13</sup> C | <sup>13</sup> C |                 |
| SW (Hz)                     | 5555.556        | 11363.636       |                 |
| maximal evolution time (ms) | 98.3            | 22.5            |                 |
| TD                          | 1024            | 512             |                 |
| 2J HMQC                     | <sup>1</sup> H  | <sup>15</sup> N |                 |
| SW (Hz)                     | 11398.177       | 7692.308        |                 |
| maximal evolution time (ms) | 52.64           | 16.64           |                 |
| TD                          | 1200            | 256             |                 |

## References

1. Dass, R.; Corliano, E.; Mulder, F. A. A., The contribution of electrostatics to hydrogen exchange in the unfolded protein state. *Biophys J* **2021**, *120* (18), 4107-4114.
